# Supplementary material
Source: MDPI journal article supplement (https://www.mdpi.com/1999-4907/6/2/492)
Supplement: s1 [file s1]

Supplementary

**Table S1.** The selection of diameter at breast height (DBH) models using *R*2 selection method. The selected models are gray shaded.

| **No of var. in Model** | ***R*2** | **Variables in Model** | **No of var. in Model** | ***R*2** | **Variables in Model** | **No of var. in Model** | ***R*2** | **Variables in Model** |
| --- | --- | --- | --- | --- | --- | --- | --- | --- |
| 1 | 0.6246 | CD | 3 | 0.7160 | CD DCT SA | 3 | 0.1459 | DCT z s |
| 1 | 0.4203 | h | 3 | 0.7125 | CD a SA | 3 | 0.1314 | N z a |
| 1 | 0.2792 | SA | 3 | 0.7124 | CD s SA | 3 | 0.1301 | N z s |
| 1 | 0.1100 | DCT | 3 | 0.7120 | CD z SA | 3 | 0.1249 | DCT s a |
| 1 | 0.1061 | N | 3 | 0.6424 | CD z a | 3 | 0.1173 | N s a |
| 1 | 0.0390 | z | 3 | 0.6420 | CD DCT z | 3 | 0.0703 | z s a |
| 1 | 0.0159 | s | 3 | 0.6419 | CD N z | 4 | 0.8383 | CD h s SA |
| 1 | 0.0026 | a | 3 | 0.6382 | CD z s | 4 | 0.8369 | CD h N SA |
| 2 | 0.8321 | CD h | 3 | 0.6318 | CD DCT a | 4 | 0.8363 | CD h N s |
| 2 | 0.7120 | CD SA | 3 | 0.6309 | CD DCT s | 4 | 0.8361 | CD h z SA |
| 2 | 0.6362 | CD z | 3 | 0.6304 | CD DCT N | 4 | 0.8361 | CD h DCT SA |
| 2 | 0.6294 | CD DCT | 3 | 0.6302 | CD N a | 4 | 0.8360 | CD h a SA |
| 2 | 0.6279 | CD a | 3 | 0.6293 | CD s a | 4 | 0.8349 | CD h z s |
| 2 | 0.6273 | CD N | 3 | 0.6290 | CD N s | 4 | 0.8349 | CD h DCT s |
| 2 | 0.6257 | CD s | 3 | 0.5796 | h DCT N | 4 | 0.8348 | CD h s a |
| 2 | 0.5512 | h N | 3 | 0.5587 | h N SA | 4 | 0.8345 | CD h DCT N |
| 2 | 0.5237 | h DCT | 3 | 0.5563 | h N s | 4 | 0.8341 | CD h N z |
| 2 | 0.4576 | h SA | 3 | 0.5537 | h N z | 4 | 0.8341 | CD h N a |
| 2 | 0.4376 | h s | 3 | 0.5512 | h N a | 4 | 0.8322 | CD h DCT z |
| 2 | 0.4220 | h z | 3 | 0.5442 | h DCT SA | 4 | 0.8321 | CD h z a |
| 2 | 0.4211 | h a | 3 | 0.5317 | h DCT s | 4 | 0.8321 | CD h DCT a |
| 2 | 0.3467 | DCT SA | 3 | 0.5237 | h DCT z | 4 | 0.7196 | CD DCT N SA |
| 2 | 0.3256 | N SA | 3 | 0.5237 | h DCT a | 4 | 0.7189 | CD N s SA |
| 2 | 0.2864 | s SA | 3 | 0.4703 | h s SA | 4 | 0.7183 | CD N a SA |
| 2 | 0.2793 | a SA | 3 | 0.4589 | h a SA | 4 | 0.7182 | CD N z SA |
| 2 | 0.2792 | z SA | 3 | 0.4579 | h z SA | 4 | 0.7167 | CD DCT s SA |
| 2 | 0.1462 | DCT N | 3 | 0.4404 | h z s | 4 | 0.7163 | CD DCT a SA |
| 2 | 0.1360 | DCT z | 3 | 0.4379 | h s a | 4 | 0.7161 | CD DCT z SA |
| 2 | 0.1221 | N z | 3 | 0.4223 | h z a | 4 | 0.7130 | CD s a SA |
| 2 | 0.1171 | DCT a | 3 | 0.3582 | DCT N SA | 4 | 0.7126 | CD z a SA |
| 2 | 0.1168 | DCT s | 3 | 0.3495 | DCT s SA | 4 | 0.7124 | CD z s SA |
| 2 | 0.1113 | N a | 3 | 0.3474 | DCT a SA | 4 | 0.6476 | CD N z a |
| 2 | 0.1113 | N s | 3 | 0.3471 | DCT z SA | 4 | 0.6471 | CD DCT z a |
| 2 | 0.0595 | z s | 3 | 0.3283 | N s SA | 4 | 0.6452 | CD z s a |
| 2 | 0.0470 | z a | 3 | 0.3270 | N z SA | 4 | 0.6450 | CD N z s |
| 2 | 0.0196 | s a | 3 | 0.3259 | N a SA | 4 | 0.6449 | CD DCT N z |

**Table S1.** *Cont.*

| **No of var. in Model** | ***R*2** | | **Variables in Model** | | **No of var. in Model** | | ***R*2** | | **Variables in Model** | | **No of var. in Model** | | ***R*2** | | **Variables in Model** | |
| --- | --- | --- | --- | --- | --- | --- | --- | --- | --- | --- | --- | --- | --- | --- | --- | --- |
| 3 | | 0.8360 | | CD h SA | | 3 | | 0.2865 | | z s SA | | 4 | | 0.6447 | | CD DCT z s |
| 3 | | 0.8348 | | CD h s | | 3 | | 0.2864 | | s a SA | | 4 | | 0.6337 | | CD DCT s a |
| 3 | | 0.8341 | | CD h N | | 3 | | 0.2793 | | z a SA | | 4 | | 0.6327 | | CD DCT N a |
| 3 | | 0.8321 | | CD h z | | 3 | | 0.1620 | | DCT N z | | 4 | | 0.6322 | | CD DCT N s |
| 3 | 0.8321 | | CD h DCT | | 3 | | 0.1540 | | DCT N a | | 4 | | 0.6322 | | CD N s a | |
| 3 | 0.8321 | | CD h a | | 3 | | 0.1498 | | DCT N s | | 4 | | 0.5867 | | h DCT N SA | |
| 3 | 0.7180 | | CD N SA | | 3 | | 0.1491 | | DCT z a | | 4 | | 0.5834 | | h DCT N s | |
| 4 | 0.5820 | | h DCT N z | | 5 | | 0.8363 | | CD h N z s | | 5 | | 0.3607 | | DCT N z s SA | |
| 4 | 0.5797 | | h DCT N a | | 5 | | 0.8362 | | CD h DCT z SA | | 5 | | 0.3599 | | DCT N z a SA | |
| 4 | 0.5641 | | h N z SA | | 5 | | 0.8362 | | CD h z a SA | | 5 | | 0.3504 | | DCT z s a SA | |
| 4 | 0.5632 | | h N s SA | | 5 | | 0.8361 | | CD h DCT a SA | | 5 | | 0.3293 | | N z s a SA | |
| 4 | 0.5589 | | h N a SA | | 5 | | 0.8351 | | CD h DCT z s | | 5 | | 0.1822 | | DCT N z s a | |
| 4 | 0.5580 | | h N z s | | 5 | | 0.8350 | | CD h z s a | | 6 | | 0.8394 | | CD h DCT N s SA | |
| 4 | 0.5563 | | h N s a | | 5 | | 0.8349 | | CD h DCT s a | | 6 | | 0.8391 | | CD h N z s SA | |
| 4 | 0.5540 | | h N z a | | 5 | | 0.8345 | | CD h DCT N z | | 6 | | 0.8389 | | CD h N s a SA | |
| 4 | 0.5503 | | h DCT s SA | | 5 | | 0.8345 | | CD h DCT N a | | 6 | | 0.8385 | | CD h DCT z s SA | |
| 4 | 0.5456 | | h DCT z SA | | 5 | | 0.8341 | | CD h N z a | | 6 | | 0.8385 | | CD h DCT s a SA | |
| 4 | 0.5443 | | h DCT a SA | | 5 | | 0.8322 | | CD h DCT z a | | 6 | | 0.8383 | | CD h z s a SA | |
| 4 | 0.5319 | | h DCT z s | | 5 | | 0.7207 | | CD DCT N s SA | | 6 | | 0.8377 | | CD h DCT N z SA | |
| 4 | 0.5318 | | h DCT s a | | 5 | | 0.7199 | | CD DCT N z SA | | 6 | | 0.8374 | | CD h DCT N a SA | |
| 4 | 0.5238 | | h DCT z a | | 5 | | 0.7198 | | CD DCT N a SA | | 6 | | 0.8374 | | CD h N z a SA | |
| 4 | 0.4710 | | h s a SA | | 5 | | 0.7193 | | CD N s a SA | | 6 | | 0.8368 | | CD h DCT N z s | |
| 4 | 0.4703 | | h z s SA | | 5 | | 0.7193 | | CD N z s SA | | 6 | | 0.8368 | | CD h DCT N s a | |
| 4 | 0.4596 | | h z a SA | | 5 | | 0.7187 | | CD N z a SA | | 6 | | 0.8363 | | CD h N z s a | |
| 4 | 0.4404 | | h z s a | | 5 | | 0.7171 | | CD DCT s a SA | | 6 | | 0.8363 | | CD h DCT z a SA | |
| 4 | 0.3599 | | DCT N s SA | | 5 | | 0.7168 | | CD DCT z s SA | | 6 | | 0.8351 | | CD h DCT z s a | |
| 4 | 0.3594 | | DCT N z SA | | 5 | | 0.7164 | | CD DCT z a SA | | 6 | | 0.8345 | | CD h DCT N z a | |
| 4 | 0.3591 | | DCT N a SA | | 5 | | 0.7132 | | CD z s a SA | | 6 | | 0.7211 | | CD DCT N z s SA | |
| 4 | 0.3504 | | DCT s a SA | | 5 | | 0.6517 | | CD N z s a | | 6 | | 0.7210 | | CD DCT N s a SA | |
| 4 | 0.3496 | | DCT z s SA | | 5 | | 0.6506 | | CD DCT z s a | | 6 | | 0.7202 | | CD DCT N z a SA | |
| 4 | 0.3476 | | DCT z a SA | | 5 | | 0.6500 | | CD DCT N z a | | 6 | | 0.7200 | | CD N z s a SA | |
| 4 | 0.3291 | | N z s SA | | 5 | | 0.6484 | | CD DCT N z s | | 6 | | 0.7173 | | CD DCT z s a SA | |
| 4 | 0.3287 | | N s a SA | | 5 | | 0.6349 | | CD DCT N s a | | 6 | | 0.6544 | | CD DCT N z s a | |
| 4 | 0.3270 | | N z a SA | | 5 | | 0.5918 | | h DCT N z SA | | 6 | | 0.5940 | | h DCT N z s SA | |
| 4 | 0.2865 | | z s a SA | | 5 | | 0.5900 | | h DCT N s SA | | 6 | | 0.5920 | | h DCT N z a SA | |
| 4 | 0.1746 | | DCT N z a | | 5 | | 0.5867 | | h DCT N a SA | | 6 | | 0.5900 | | h DCT N s a SA | |
| 4 | 0.1679 | | DCT N z s | | 5 | | 0.5851 | | h DCT N z s | | 6 | | 0.5851 | | h DCT N z s a | |
| 4 | 0.1611 | | DCT z s a | | 5 | | 0.5835 | | h DCT N s a | | 6 | | 0.5680 | | h N z s a SA | |
| 4 | 0.1583 | | DCT N s a | | 5 | | 0.5820 | | h DCT N z a | | 6 | | 0.5511 | | h DCT z s a SA | |
| 4 | 0.1411 | | N z s a | | 5 | | 0.5674 | | h N z s SA | | 6 | | 0.3615 | | DCT N z s a SA | |
| 5 | 0.8389 | | CD h N s SA | | 5 | | 0.5651 | | h N z a SA | | 7 | | 0.8396 | | CD h DCT N z s SA | |
| 5 | 0.8385 | | CD h DCT s SA | | 5 | | 0.5633 | | h N s a SA | | 7 | | 0.8394 | | CD h DCT N s a SA | |

**Table S1.** *Cont.*

| **No of var. in Model** | ***R*2** | **Variables in Model** | **No of var. in Model** | ***R*2** | **Variables in Model** | **No of var. in Model** | ***R*2** | **Variables in Model** |
| --- | --- | --- | --- | --- | --- | --- | --- | --- |
| 5 | 0.8383 | CD h z s SA | 5 | 0.5581 | h N z s a | 7 | 0.8391 | CD h N z s a SA |
| 5 | 0.8383 | CD h s a SA | 5 | 0.5511 | h DCT z s SA | 7 | 0.8385 | CD h DCT z s a SA |
| 5 | 0.8374 | CD h DCT N SA | 5 | 0.5503 | h DCT s a SA | 7 | 0.8378 | CD h DCT N z a SA |
| 5 | 0.8373 | CD h N z SA | 5 | 0.5458 | h DCT z a SA | 7 | 0.8368 | CD h DCT N z s a |
| 5 | 0.8370 | CD h N a SA | 5 | 0.5321 | h DCT z s a | 7 | 0.7217 | CD DCT N z s a SA |
| 5 | 0.8368 | CD h DCT N s | 5 | 0.4711 | h z s a SA | 7 | 0.5941 | h DCT N z s a SA |
| 5 | 0.8363 | CD h N s a | 5 | 0.3610 | DCT N s a SA | 8 | 0.8396 | CD h DCT N z s a SA |

| **Model D1** | **Model D2** |
| --- | --- |
|  |  |
| **Model D3** |  |
|  |  |

**Figure S1.** Predicted *vs*. observed diameter at breast height (DBH) for three selected black pine DBH models. The predicted and observed DBH data were back-transformed to their original values. The solid line represents fitted linear model. Models’ description and evaluation statistic are presented in Table 3.

**Table S2.** The selection of volume merchantable tree (V) models using R2 selection method. The selected models are gray shaded.

| **No of var. in Model** | ***R*2** | **Variables in Model** | **No of var. in Model** | ***R*2** | **Variables in Model** | **No of var. in Model** | ***R*2** | **Variables in Model** |
| --- | --- | --- | --- | --- | --- | --- | --- | --- |
| 1 | 0.6841 | h | 3 | 0.7527 | h N SA | 3 | 0.0833 | DCT N a |
| 1 | 0.4300 | CD | 3 | 0.7506 | h N s | 3 | 0.0778 | DCT s a |
| 1 | 0.3533 | SA | 3 | 0.7505 | h DCT SA | 3 | 0.0762 | z s a |
| 1 | 0.0596 | DCT | 3 | 0.7501 | h N z | 3 | 0.0761 | N z s |
| 1 | 0.0430 | z | 3 | 0.7469 | h N a | 3 | 0.0723 | DCT N s |
| 1 | 0.0419 | N | 3 | 0.7428 | h DCT s | 3 | 0.0574 | N s a |
| 1 | 0.0090 | s | 3 | 0.7380 | h DCT z | 4 | 0.8945 | CD h s SA |
| 1 | 0.0082 | a | 3 | 0.7378 | h DCT a | 4 | 0.8941 | CD h z SA |
| 2 | 0.8895 | CD h | 3 | 0.7141 | h s SA | 4 | 0.8929 | CD h N SA |
| 2 | 0.7468 | h N | 3 | 0.7080 | h z SA | 4 | 0.8928 | CD h a SA |
| 2 | 0.7376 | h DCT | 3 | 0.7067 | h a SA | 4 | 0.8928 | CD h DCT SA |
| 2 | 0.7064 | h SA | 3 | 0.6949 | h z s | 4 | 0.8920 | CD h N s |
| 2 | 0.6946 | h s | 3 | 0.6946 | h s a | 4 | 0.8918 | CD h z s |
| 2 | 0.6842 | h a | 3 | 0.6843 | h z a | 4 | 0.8918 | CD h s a |
| 2 | 0.6842 | h z | 3 | 0.6210 | CD N SA | 4 | 0.8916 | CD h DCT s |
| 2 | 0.5976 | CD SA | 3 | 0.6050 | CD DCT SA | 4 | 0.8908 | CD h N z |
| 2 | 0.4478 | CD z | 3 | 0.6001 | CD a SA | 4 | 0.8902 | CD h N a |
| 2 | 0.4438 | CD N | 3 | 0.5979 | CD z SA | 4 | 0.8902 | CD h DCT N |
| 2 | 0.4391 | CD a | 3 | 0.5976 | CD s SA | 4 | 0.8898 | CD h z a |
| 2 | 0.4387 | CD DCT | 3 | 0.4693 | CD N z | 4 | 0.8898 | CD h DCT z |
| 2 | 0.4304 | CD s | 3 | 0.4628 | CD z a | 4 | 0.8895 | CD h DCT a |
| 2 | 0.3795 | DCT SA | 3 | 0.4582 | CD DCT z | 4 | 0.7684 | h DCT N SA |
| 2 | 0.3591 | N SA | 3 | 0.4514 | CD N a | 4 | 0.7661 | h DCT N z |
| 2 | 0.3556 | s SA | 3 | 0.4488 | CD z s | 4 | 0.7657 | h DCT N s |
| 2 | 0.3541 | a SA | 3 | 0.4472 | CD DCT N | 4 | 0.7631 | h DCT N a |
| 2 | 0.3536 | z SA | 3 | 0.4460 | CD DCT a | 4 | 0.7588 | h N z SA |
| 2 | 0.0924 | DCT z | 3 | 0.4450 | CD N s | 4 | 0.7559 | h N s SA |
| 2 | 0.0728 | DCT a | 3 | 0.4398 | CD s a | 4 | 0.7545 | h DCT s SA |
| 2 | 0.0696 | DCT N | 3 | 0.4394 | CD DCT s | 4 | 0.7535 | h DCT z SA |
| 2 | 0.0692 | N z | 3 | 0.3817 | DCT a SA | 4 | 0.7530 | h N z s |
| 2 | 0.0636 | DCT s | 3 | 0.3803 | DCT s SA | 4 | 0.7527 | h N a SA |
| 2 | 0.0602 | z a | 3 | 0.3803 | DCT z SA | 4 | 0.7506 | h N s a |
| 2 | 0.0558 | z s | 3 | 0.3795 | DCT N SA | 4 | 0.7505 | h DCT a SA |
| 2 | 0.0527 | N a | 3 | 0.3605 | N s SA | 4 | 0.7502 | h N z a |
| 2 | 0.0457 | N s | 3 | 0.3604 | N a SA | 4 | 0.7431 | h DCT s a |
| 2 | 0.0187 | s a | 3 | 0.3601 | N z SA | 4 | 0.7430 | h DCT z s |
| 3 | 0.8928 | CD h SA | 3 | 0.3567 | s a SA | 4 | 0.7381 | h DCT z a |
| 3 | 0.8916 | CD h s | 3 | 0.3558 | z s SA | 4 | 0.7150 | h z s SA |
| 3 | 0.8901 | CD h N | 3 | 0.3542 | z a SA | 4 | 0.7142 | h s a SA |
| 3 | 0.8898 | CD h z | 3 | 0.1147 | DCT z a | 4 | 0.7088 | h z a SA |
| 3 | 0.8895 | CD h a | 3 | 0.0991 | DCT z s | 4 | 0.6949 | h z s a |
| 3 | 0.8895 | CD h DCT | 3 | 0.0966 | DCT N z | 4 | 0.6225 | CD DCT N SA |

**Table S2.** *Cont.*

| **No of var. in Model** | ***R*2** | **Variables in Model** | **No of var. in Model** | ***R*2** | **Variables in Model** | **No of var. in Model** | ***R*2** | **Variables in Model** |
| --- | --- | --- | --- | --- | --- | --- | --- | --- |
| 3 | 0.7629 | h DCT N | 3 | 0.0874 | N z a | 4 | 0.6224 | CD N a SA |
| 4 | 0.6214 | CD N s SA | 5 | 0.8928 | CD h DCT a SA | 5 | 0.3828 | DCT N s a SA |
| 4 | 0.6211 | CD N z SA | 5 | 0.8924 | CD h N z s | 5 | 0.3821 | DCT N z a SA |
| 4 | 0.6067 | CD DCT a SA | 5 | 0.8922 | CD h N s a | 5 | 0.3809 | DCT N z s SA |
| 4 | 0.6051 | CD DCT z SA | 5 | 0.8921 | CD h DCT N s | 5 | 0.3622 | N z s a SA |
| 4 | 0.6051 | CD DCT s SA | 5 | 0.8919 | CD h z s a | 5 | 0.1262 | DCT N z s a |
| 4 | 0.6001 | CD s a SA | 5 | 0.8918 | CD h DCT z s | 6 | 0.8957 | CD h N z s SA |
| 4 | 0.6001 | CD z a SA | 5 | 0.8918 | CD h DCT s a | 6 | 0.8955 | CD h DCT z s SA |
| 4 | 0.5979 | CD z s SA | 5 | 0.8908 | CD h DCT N z | 6 | 0.8955 | CD h z s a SA |
| 4 | 0.4831 | CD N z a | 5 | 0.8908 | CD h N z a | 6 | 0.8947 | CD h DCT N s SA |
| 4 | 0.4728 | CD DCT N z | 5 | 0.8903 | CD h DCT N a | 6 | 0.8947 | CD h N s a SA |
| 4 | 0.4723 | CD N z s | 5 | 0.8898 | CD h DCT z a | 6 | 0.8946 | CD h DCT s a SA |
| 4 | 0.4709 | CD DCT z a | 5 | 0.7743 | h DCT N z SA | 6 | 0.8945 | CD h DCT N z SA |
| 4 | 0.4647 | CD z s a | 5 | 0.7709 | h DCT N s SA | 6 | 0.8945 | CD h N z a SA |
| 4 | 0.4599 | CD DCT z s | 5 | 0.7685 | h DCT N a SA | 6 | 0.8941 | CD h DCT z a SA |
| 4 | 0.4540 | CD DCT N a | 5 | 0.7682 | h DCT N z s | 6 | 0.8930 | CD h DCT N a SA |
| 4 | 0.4530 | CD N s a | 5 | 0.7661 | h DCT N s a | 6 | 0.8925 | CD h DCT N z s |
| 4 | 0.4486 | CD DCT N s | 5 | 0.7661 | h DCT N z a | 6 | 0.8925 | CD h N z s a |
| 4 | 0.4471 | CD DCT s a | 5 | 0.7609 | h N z s SA | 6 | 0.8923 | CD h DCT N s a |
| 4 | 0.3828 | DCT s a SA | 5 | 0.7592 | h N z a SA | 6 | 0.8919 | CD h DCT z s a |
| 4 | 0.3820 | DCT z a SA | 5 | 0.7566 | h DCT z s SA | 6 | 0.8908 | CD h DCT N z a |
| 4 | 0.3818 | DCT N a SA | 5 | 0.7560 | h N s a SA | 6 | 0.7758 | h DCT N z s SA |
| 4 | 0.3809 | DCT z s SA | 5 | 0.7546 | h DCT s a SA | 6 | 0.7744 | h DCT N z a SA |
| 4 | 0.3803 | DCT N z SA | 5 | 0.7535 | h DCT z a SA | 6 | 0.7710 | h DCT N s a SA |
| 4 | 0.3803 | DCT N s SA | 5 | 0.7531 | h N z s a | 6 | 0.7683 | h DCT N z s a |
| 4 | 0.3620 | N s a SA | 5 | 0.7432 | h DCT z s a | 6 | 0.7611 | h N z s a SA |
| 4 | 0.3611 | N z s SA | 5 | 0.7153 | h z s a SA | 6 | 0.7566 | h DCT z s a SA |
| 4 | 0.3609 | N z a SA | 5 | 0.6237 | CD DCT N a SA | 6 | 0.6242 | CD DCT N s a SA |
| 4 | 0.3567 | z s a SA | 5 | 0.6229 | CD DCT N s SA | 6 | 0.6241 | CD DCT N z a SA |
| 4 | 0.1237 | DCT z s a | 5 | 0.6229 | CD N s a SA | 6 | 0.6236 | CD N z s a SA |
| 4 | 0.1187 | DCT N z a | 5 | 0.6228 | CD N z a SA | 6 | 0.6232 | CD DCT N z s SA |
| 4 | 0.1020 | DCT N z s | 5 | 0.6226 | CD DCT N z SA | 6 | 0.6068 | CD DCT z s a SA |
| 4 | 0.0967 | N z s a | 5 | 0.6216 | CD N z s SA | 6 | 0.4901 | CD DCT N z s a |
| 4 | 0.0868 | DCT N s a | 5 | 0.6068 | CD DCT s a SA | 6 | 0.3829 | DCT N z s a SA |
| 5 | 0.8955 | CD h z s SA | 5 | 0.6067 | CD DCT z a SA | 7 | 0.8958 | CD h DCT N z s SA |
| 5 | 0.8946 | CD h s a SA | 5 | 0.6051 | CD DCT z s SA | 7 | 0.8957 | CD h N z s a SA |
| 5 | 0.8946 | CD h N s SA | 5 | 0.6001 | CD z s a SA | 7 | 0.8955 | CD h DCT z s a SA |
| 5 | 0.8946 | CD h DCT s SA | 5 | 0.4875 | CD N z s a | 7 | 0.8947 | CD h DCT N s a SA |
| 5 | 0.8945 | CD h N z SA | 5 | 0.4854 | CD DCT N z a | 7 | 0.8945 | CD h DCT N z a SA |
| 5 | 0.8941 | CD h z a SA | 5 | 0.4761 | CD DCT N z s | 7 | 0.8926 | CD h DCT N z s a |
| 5 | 0.8941 | CD h DCT z SA | 5 | 0.4736 | CD DCT z s a | 7 | 0.7758 | h DCT N z s a SA |
| 5 | 0.8930 | CD h DCT N SA | 5 | 0.4558 | CD DCT N s a | 7 | 0.6249 | CD DCT N z s a SA |
| 5 | 0.8929 | CD h N a SA | 5 | 0.3829 | DCT z s a SA | 8 | 0.8958 | CD h DCT N z s a SA |

| **Model V1** | **Model V2** |
| --- | --- |
|  |  |
| **Model V3** | **Model V4** |
|  |  |

**Figure S2.** Predicted *vs.* observed merchantable tree volume (V) for four selected black pine merchantable tree volume models. The predicted and observed volume data were
back-transformed to their original values. The solid line represents fitted linear model. Models’ description and evaluation statistic are presented in Table 4.

**Table S3.** The selection of aboveground biomass (AGB) models using R2 selection method. The selected models are gray shaded.

| **No of var. in Model** | ***R*2** | **Variables in Model** | **No of var. in Model** | ***R*2** | **Variables in Model** | **No of var. in Model** | ***R*2** | **Variables in Model** |
| --- | --- | --- | --- | --- | --- | --- | --- | --- |
| 1 | 0.5984 | CD | 3 | 0.6941 | CD DCT SA | 3 | 0.1431 | DCT N s |
| 1 | 0.4347 | h | 3 | 0.6917 | CD a SA | 3 | 0.1271 | N z a |
| 1 | 0.2820 | SA | 3 | 0.6910 | CD s SA | 3 | 0.1236 | N z s |
| 1 | 0.1075 | DCT | 3 | 0.6907 | CD z SA | 3 | 0.1229 | DCT s a |
| 1 | 0.0991 | N | 3 | 0.6183 | CD z a | 3 | 0.1109 | N s a |
| 1 | 0.0396 | z | 3 | 0.6171 | CD N z | 3 | 0.0710 | z s a |
| 1 | 0.0145 | s | 3 | 0.6159 | CD DCT z | 4 | 0.8267 | CD h s SA |
| 1 | 0.0034 | a | 3 | 0.6125 | CD z s | 4 | 0.8256 | CD h N SA |
| 2 | 0.8208 | CD h | 3 | 0.6058 | CD DCT a | 4 | 0.8248 | CD h z SA |
| 2 | 0.6907 | CD SA | 3 | 0.6052 | CD N a | 4 | 0.8248 | CD h N s |
| 2 | 0.6108 | CD z | 3 | 0.6039 | CD DCT N | 4 | 0.8247 | CD h DCT SA |
| 2 | 0.6026 | CD a | 3 | 0.6038 | CD s a | 4 | 0.8247 | CD h a SA |
| 2 | 0.6025 | CD DCT | 3 | 0.6038 | CD DCT s | 4 | 0.8234 | CD h z s |
| 2 | 0.6015 | CD N | 3 | 0.6029 | CD N s | 4 | 0.8233 | CD h s a |
| 2 | 0.5993 | CD s | 3 | 0.5871 | h DCT N | 4 | 0.8233 | CD h DCT s |
| 2 | 0.5583 | h N | 3 | 0.5656 | h N SA | 4 | 0.8230 | CD h DCT N |
| 2 | 0.5357 | h DCT | 3 | 0.5630 | h N s | 4 | 0.8228 | CD h N a |
| 2 | 0.4703 | h SA | 3 | 0.5607 | h N z | 4 | 0.8228 | CD h N z |
| 2 | 0.4507 | h s | 3 | 0.5583 | h N a | 4 | 0.8208 | CD h z a |
| 2 | 0.4363 | h z | 3 | 0.5551 | h DCT SA | 4 | 0.8208 | CD h DCT z |
| 2 | 0.4352 | h a | 3 | 0.5429 | h DCT s | 4 | 0.8208 | CD h DCT a |
| 2 | 0.3473 | DCT SA | 3 | 0.5358 | h DCT a | 4 | 0.6985 | CD DCT N SA |
| 2 | 0.3234 | N SA | 3 | 0.5357 | h DCT z | 4 | 0.6981 | CD N s SA |
| 2 | 0.2882 | s SA | 3 | 0.4819 | h s SA | 4 | 0.6979 | CD N a SA |
| 2 | 0.2820 | a SA | 3 | 0.4712 | h a SA | 4 | 0.6976 | CD N z SA |
| 2 | 0.2820 | z SA | 3 | 0.4706 | h z SA | 4 | 0.6947 | CD DCT a SA |
| 2 | 0.1399 | DCT N | 3 | 0.4533 | h z s | 4 | 0.6946 | CD DCT s SA |
| 2 | 0.1341 | DCT z | 3 | 0.4509 | h s a | 4 | 0.6942 | CD DCT z SA |
| 2 | 0.1162 | N z | 3 | 0.4365 | h z a | 4 | 0.6920 | CD s a SA |
| 2 | 0.1159 | DCT a | 3 | 0.3565 | DCT N SA | 4 | 0.6917 | CD z a SA |
| 2 | 0.1135 | DCT s | 3 | 0.3496 | DCT s SA | 4 | 0.6910 | CD z s SA |
| 2 | 0.1054 | N a | 3 | 0.3484 | DCT a SA | 4 | 0.6241 | CD N z a |
| 2 | 0.1038 | N s | 3 | 0.3476 | DCT z SA | 4 | 0.6223 | CD DCT z a |
| 2 | 0.0586 | z s | 3 | 0.3257 | N s SA | 4 | 0.6209 | CD z s a |
| 2 | 0.0491 | z a | 3 | 0.3246 | N z SA | 4 | 0.6200 | CD N z s |
| 2 | 0.0192 | s a | 3 | 0.3239 | N a SA | 4 | 0.6194 | CD DCT N z |
| 3 | 0.8247 | CD h SA | 3 | 0.2883 | s a SA | 4 | 0.6182 | CD DCT z s |
| 3 | 0.8232 | CD h s | 3 | 0.2883 | z s SA | 4 | 0.6074 | CD DCT s a |
| 3 | 0.8228 | CD h N | 3 | 0.2820 | z a SA | 4 | 0.6071 | CD DCT N a |
| 3 | 0.8208 | CD h z | 3 | 0.1568 | DCT N z | 4 | 0.6069 | CD N s a |
| 3 | 0.8208 | CD h a | 3 | 0.1490 | DCT z a | 4 | 0.6055 | CD DCT N s |

**Table S3.** *Cont.*

| **No of var. in Model** | ***R*2** | **Variables in Model** | **No of var. in Model** | ***R*2** | **Variables in Model** | **No of var. in Model** | ***R*2** | **Variables in Model** |
| --- | --- | --- | --- | --- | --- | --- | --- | --- |
| 3 | 0.8208 | CD h DCT | 3 | 0.1489 | DCT N a | 4 | 0.5940 | h DCT N SA |
| 3 | 0.6974 | CD N SA | 3 | 0.1431 | DCT z s | 4 | 0.5905 | h DCT N s |
| 4 | 0.5894 | h DCT N z | 5 | 0.8248 | CD h z a SA | 5 | 0.3587 | DCT N z s SA |
| 4 | 0.5873 | h DCT N a | 5 | 0.8248 | CD h DCT z SA | 5 | 0.3585 | DCT N z a SA |
| 4 | 0.5708 | h N z SA | 5 | 0.8248 | CD h N z s | 5 | 0.3509 | DCT z s a SA |
| 4 | 0.5697 | h N s SA | 5 | 0.8247 | CD h DCT a SA | 5 | 0.3269 | N z s a SA |
| 4 | 0.5657 | h N a SA | 5 | 0.8235 | CD h z s a | 5 | 0.1783 | DCT N z s a |
| 4 | 0.5646 | h N z s | 5 | 0.8234 | CD h DCT z s | 6 | 0.8276 | CD h DCT N s SA |
| 4 | 0.5630 | h N s a | 5 | 0.8233 | CD h DCT s a | 6 | 0.8275 | CD h N z s SA |
| 4 | 0.5609 | h N z a | 5 | 0.8230 | CD h DCT N a | 6 | 0.8274 | CD h N s a SA |
| 4 | 0.5605 | h DCT s SA | 5 | 0.8230 | CD h DCT N z | 6 | 0.8268 | CD h DCT z s SA |
| 4 | 0.5565 | h DCT z SA | 5 | 0.8228 | CD h N z a | 6 | 0.8267 | CD h DCT s a SA |
| 4 | 0.5551 | h DCT a SA | 5 | 0.8208 | CD h DCT z a | 6 | 0.8267 | CD h z s a SA |
| 4 | 0.5431 | h DCT s a | 5 | 0.6993 | CD DCT N s SA | 6 | 0.8261 | CD h DCT N z SA |
| 4 | 0.5430 | h DCT z s | 5 | 0.6990 | CD DCT N a SA | 6 | 0.8260 | CD h N z a SA |
| 4 | 0.5358 | h DCT z a | 5 | 0.6988 | CD DCT N z SA | 6 | 0.8258 | CD h DCT N a SA |
| 4 | 0.4824 | h s a SA | 5 | 0.6988 | CD N s a SA | 6 | 0.8251 | CD h DCT N s a |
| 4 | 0.4819 | h z s SA | 5 | 0.6985 | CD N z s SA | 6 | 0.8250 | CD h DCT N z s |
| 4 | 0.4719 | h z a SA | 5 | 0.6985 | CD N z a SA | 6 | 0.8249 | CD h N z s a |
| 4 | 0.4533 | h z s a | 5 | 0.6953 | CD DCT s a SA | 6 | 0.8248 | CD h DCT z a SA |
| 4 | 0.3579 | DCT N s SA | 5 | 0.6949 | CD DCT z a SA | 6 | 0.8235 | CD h DCT z s a |
| 4 | 0.3579 | DCT N a SA | 5 | 0.6947 | CD DCT z s SA | 6 | 0.8230 | CD h DCT N z a |
| 4 | 0.3576 | DCT N z SA | 5 | 0.6922 | CD z s a SA | 6 | 0.6999 | CD DCT N s a SA |
| 4 | 0.3509 | DCT s a SA | 5 | 0.6280 | CD N z s a | 6 | 0.6998 | CD DCT N z s SA |
| 4 | 0.3497 | DCT z s SA | 5 | 0.6258 | CD DCT N z a | 6 | 0.6996 | CD N z s a SA |
| 4 | 0.3485 | DCT z a SA | 5 | 0.6254 | CD DCT z s a | 6 | 0.6995 | CD DCT N z a SA |
| 4 | 0.3265 | N z s SA | 5 | 0.6226 | CD DCT N z s | 6 | 0.6955 | CD DCT z s a SA |
| 4 | 0.3264 | N s a SA | 5 | 0.6090 | CD DCT N s a | 6 | 0.6299 | CD DCT N z s a |
| 4 | 0.3248 | N z a SA | 5 | 0.5988 | h DCT N z SA | 6 | 0.6007 | h DCT N z s SA |
| 4 | 0.2885 | z s a SA | 5 | 0.5968 | h DCT N s SA | 6 | 0.5989 | h DCT N z a SA |
| 4 | 0.1711 | DCT N z a | 5 | 0.5940 | h DCT N a SA | 6 | 0.5970 | h DCT N s a SA |
| 4 | 0.1622 | DCT N z s | 5 | 0.5921 | h DCT N z s | 6 | 0.5922 | h DCT N z s a |
| 4 | 0.1602 | DCT z s a | 5 | 0.5908 | h DCT N s a | 6 | 0.5740 | h N z s a SA |
| 4 | 0.1529 | DCT N s a | 5 | 0.5894 | h DCT N z a | 6 | 0.5613 | h DCT z s a SA |
| 4 | 0.1363 | N z s a | 5 | 0.5736 | h N z s SA | 6 | 0.3598 | DCT N z s a SA |
| 5 | 0.8274 | CD h N s SA | 5 | 0.5714 | h N z a SA | 7 | 0.8277 | CD h DCT N z s SA |
| 5 | 0.8267 | CD h z s SA | 5 | 0.5697 | h N s a SA | 7 | 0.8276 | CD h DCT N s a SA |
| 5 | 0.8267 | CD h DCT s SA | 5 | 0.5646 | h N z s a | 7 | 0.8275 | CD h N z s a SA |
| 5 | 0.8267 | CD h s a SA | 5 | 0.5613 | h DCT z s SA | 7 | 0.8268 | CD h DCT z s a SA |
| 5 | 0.8260 | CD h N z SA | 5 | 0.5605 | h DCT s a SA | 7 | 0.8261 | CD h DCT N z a SA |

**Table S3.** *Cont.*

| **No of var. in Model** | ***R*2** | **Variables in Model** | **No of var. in Model** | ***R*2** | **Variables in Model** | **No of var. in Model** | ***R*2** | **Variables in Model** |
| --- | --- | --- | --- | --- | --- | --- | --- | --- |
| 5 | 0.8258 | CD h DCT N SA | 5 | 0.5565 | h DCT z a SA | 7 | 0.8251 | CD h DCT N z s a |
| 5 | 0.8256 | CD h N a SA | 5 | 0.5434 | h DCT z s a | 7 | 0.7007 | CD DCT N z s a SA |
| 5 | 0.8250 | CD h DCT N s | 5 | 0.4825 | h z s a SA | 7 | 0.6007 | h DCT N z s a SA |
| 5 | 0.8249 | CD h N s a | 5 | 0.3595 | DCT N s a SA | 8 | 0.8277 | CD h DCT N z s a SA |

| **Model B1** | **Model B2** |
| --- | --- |
|  |  |
| **Model B3** |  |
|  |  |

**Figure S3.** Predicted *vs.* observed aboveground biomass (AGB) for three selected black pine aboveground biomass models. The predicted and observed biomass data were back-transformed to their original values. The solid line represents fitted linear model. Models’ description and evaluation statistic are presented in Table 5.
